# Supplementary material for: Neuronal deletion of the circadian clock gene Bmal1 induces cell-autonomous dopaminergic neurodegeneration
Source: JCI journal article supplement (doi:10.1172/jci.insight.162771), 2023-11-30
Supplement: sd1 [file 1]

FIGURE S1

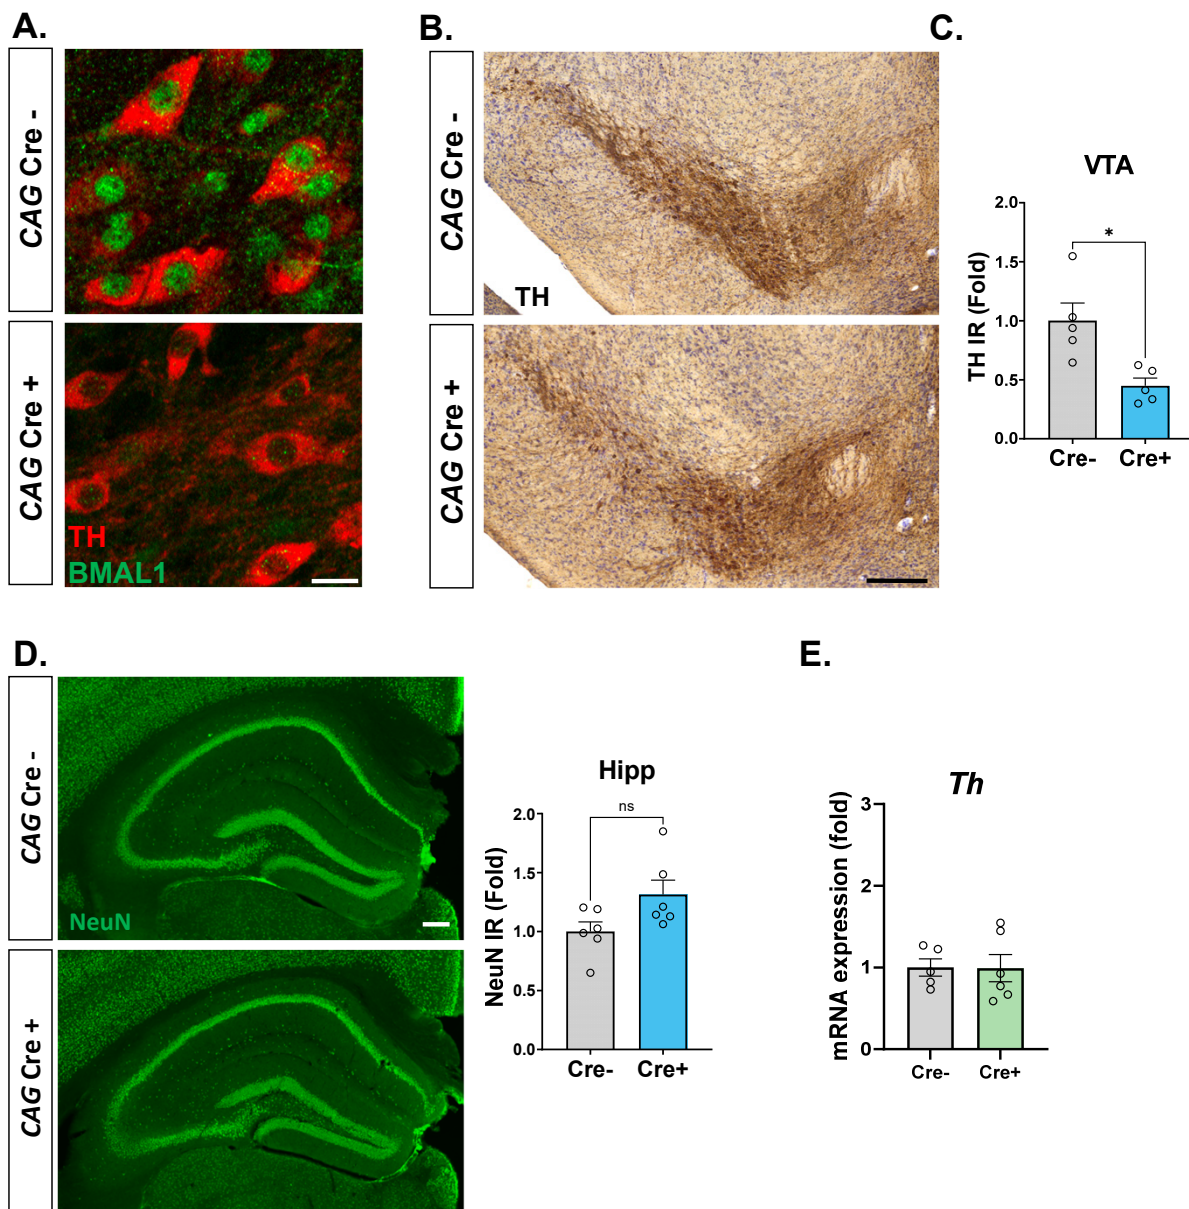

**Supplemental Figure 1: Global inducible *Bmal1* KO mice exhibit dopaminergic neuron loss within the Ventral Tegmental Area but does not impact the hippocampus or *Th* gene expression.**

A. Representative confocal images of TH (red) and BMAL1 (green) immunoreactivity in the SNpc of global inducible *Bmal1* KO mice (CAG-Cre+) and Cre- control mice, 2 months after tamoxifen. Scale bar = 25 $\mu$ m.

B. Representative images of TH (brown) and cresyl violet (purple) staining of the SNpc and VTA from global inducible *Bmal1* KO mice (CAG-Cre+) and Cre- control mice, 2 months after tamoxifen.

C. Quantification of TH+ neurons in the VTA of the mice from Fig. 1A (shown in B). n=5 mice per genotype. Fold change is normalized to Cre- condition. \*P < 0.05 by two-tailed t test.

D. Representative images of NeuN staining in the hippocampus of global inducible *Bmal1* KO mice (CAG Cre+) and Cre- control mice. Percent area was used to determine neuronal density and normalized to Cre- condition. Quantification is shown in the graph on the right. n=6 mice per genotype. ns, not significant by two-tailed t test.

E. Quantification of *Th* mRNA in cortex samples from 9mo *Nestin-Cre;Bmal1<sup>ff</sup>* mice and Cre- controls. No significant difference by 2-tailed t-test (P>0.1). Graphs depict mean $\pm$ SEM.

## FIGURE S2

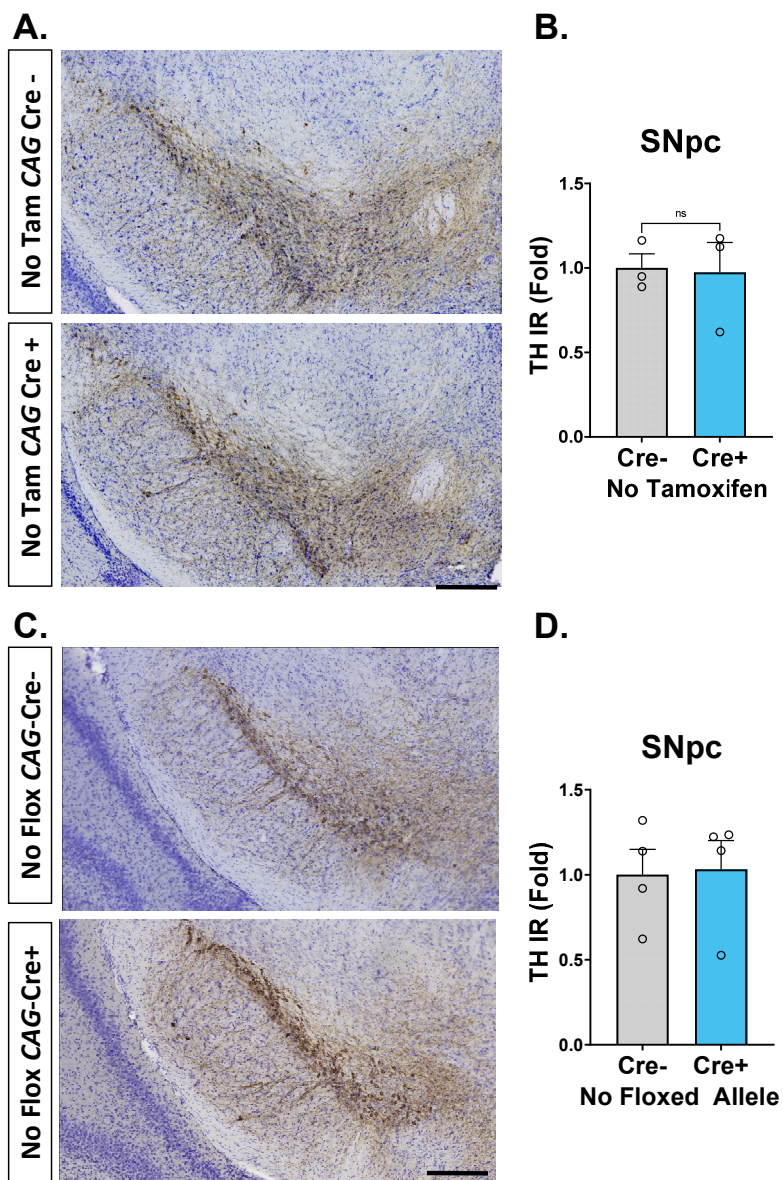

### Supplemental Figure 2: Cre expression does not cause dopaminergic neuron loss.

A. Representative images of TH (brown) and cresyl violet (purple) staining the SNpc of *CAG-Cre<sup>ERT2+</sup>;Bmal1<sup>ff</sup>* and Cre- control mice which were not treated with tamoxifen. Scale bar = 150 $\mu$ m.

B. Quantification of TH+ neurons in the SNpc in mice from A. n=3 mice per genotype. ns, not significant by two-tailed t test ( $P>0.1$ ).

C. Representative images of TH (brown) and cresyl violet (purple) staining the SNpc of *CAG-Cre<sup>ERT2+</sup>* and Cre- control mice which were treated with tamoxifen, but did not have floxed alleles. Scale bar = 150 $\mu$ m.

D. Quantification of TH+ neurons in the SNpc in mice from C. n=4 mice per genotype. ns, not significant by two-tailed t test ( $P>0.1$ ).

Each circle represents data from a single mouse. Fold change was normalized to average of Cre- condition. Graphs depict mean $\pm$ SEM.

**FIGURE S3**

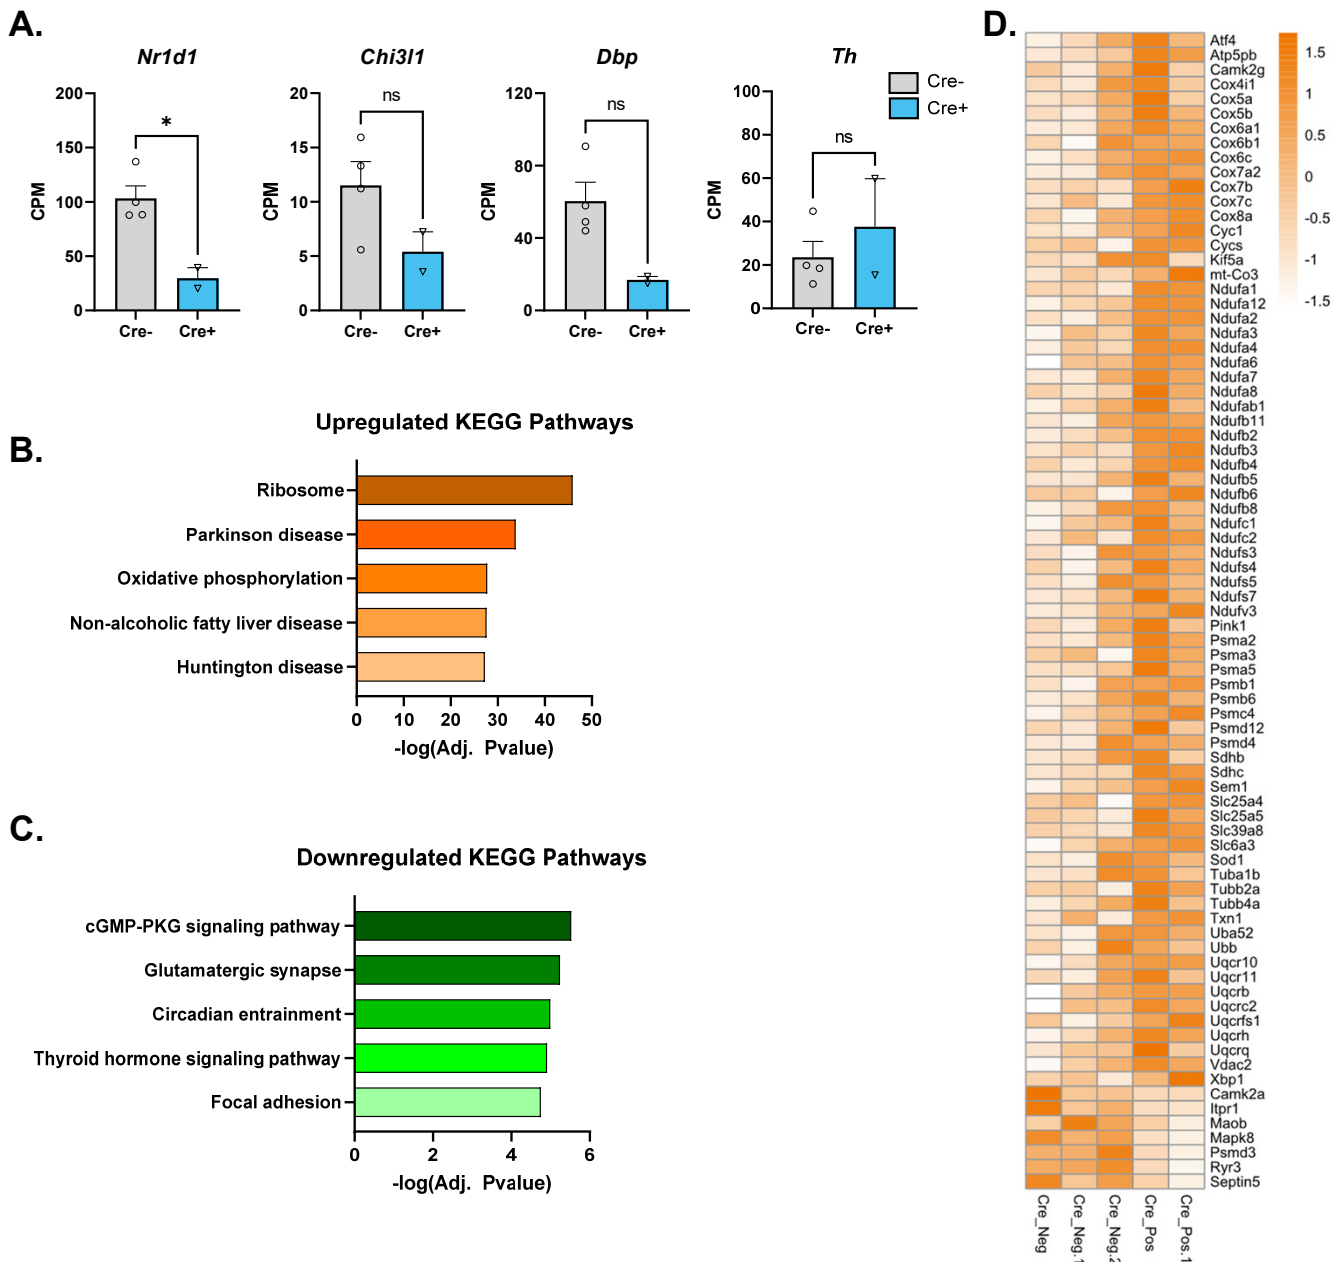

**Supplemental Figure 3: Gene expression in midbrain of global *Bmal1* KO mice.**

- A. Quantification of circadian gene expression (CPM: counts per million) in midbrain tissue from global inducible *Bmal1* KO (*CAG-Cre+;Bmal1<sup>fl/fl</sup>*) and Cre- control mice from RNAseq data.
- B. Exploratory KEGG Pathway analysis showing pathways associated with upregulated genes in the *CAG-Cre+;Bmal1<sup>fl/fl</sup>* midbrain tissue. DEGs with unadjusted p value < 0.05 were used.
- C. Exploratory KEGG Pathway analysis showing pathways associated with downregulated genes in the *CAG-Cre+;Bmal1<sup>fl/fl</sup>* midbrain tissue. DEGs with unadjusted p value < 0.05 were used.
- D. Heatmap showing expression of KEGG Parkinson Disease pathway genes in midbrain tissue from global inducible *Bmal1* KO (*CAG-Cre+;Bmal1<sup>fl/fl</sup>*) and Cre- control mice from RNAseq data.

Graphs depict mean  $\pm$  SEM

FIGURE S4

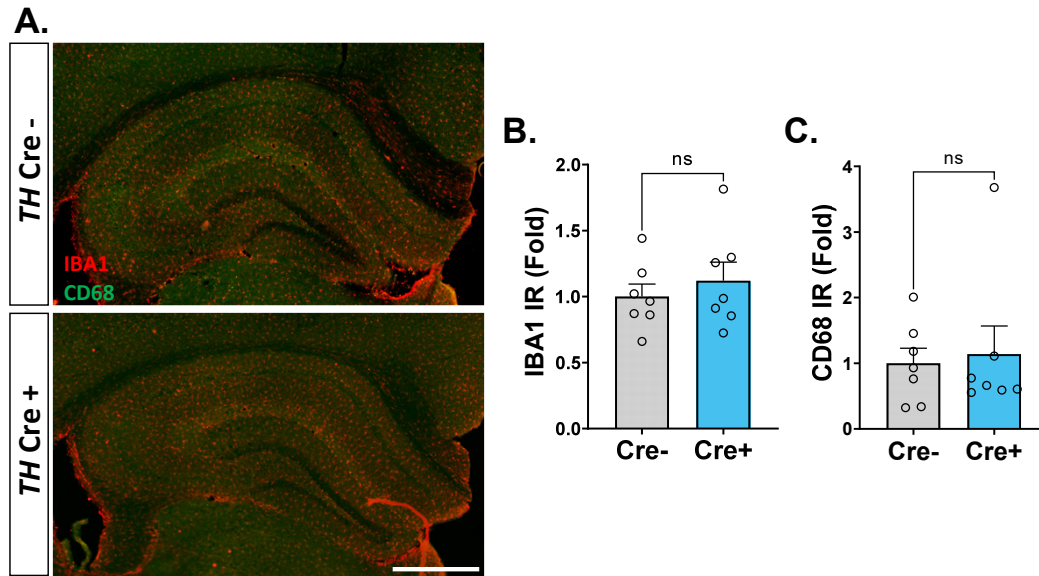

**Supplemental Figure 4: Tyrosine Hydroxylase-specific *Bmal1* KO mice exhibit no changes in hippocampal microgliosis.**

A. Representative images of IBA1 and CD68 staining in 2-3 month old Cre- control and *TH-Cre+; Bmal1<sup>fl/fl</sup>* mouse hippocampus.

B. Quantification of IBA1 immunoreactivity (IR) in hippocampus. n=6 mice per genotype, 2-3 sections averaged per mouse.

C. Quantification of CD68 staining. n=6 mice per genotype. ns, not significant by two-tailed t test. 2-3 sections averaged per mouse.

In B and C, fold change was normalized to the average of the Cre- condition. NS = not significant,  $p > 0.1$  by 2-tailed T-test. Scale bar = 500 $\mu$ m. Graphs depict mean  $\pm$  SEM.

**FIGURE S5**

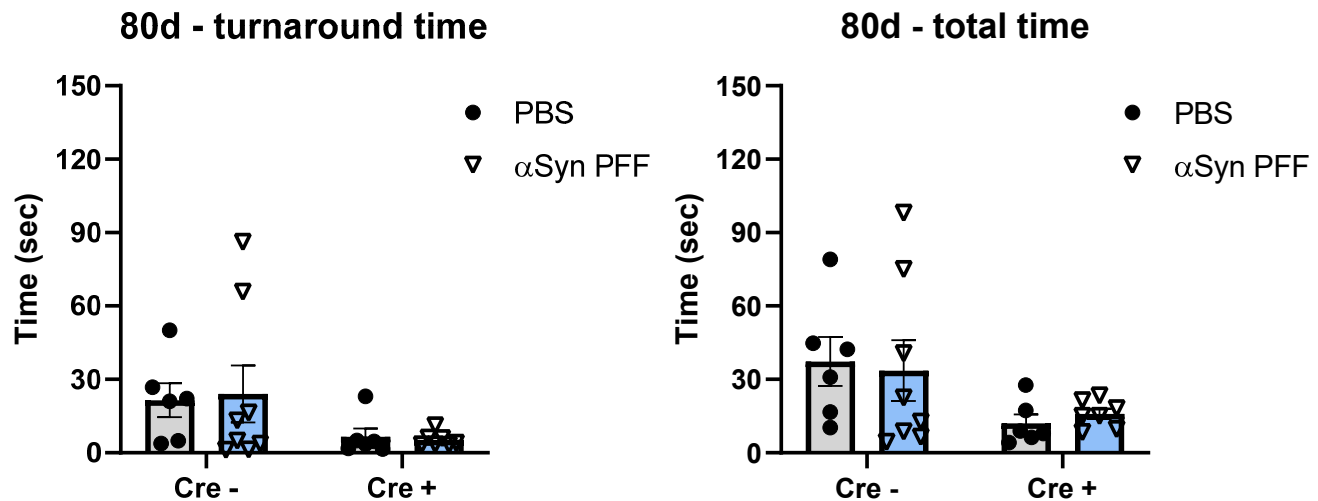

**Supplemental Figure 5: Effect of global *Bmal1* deletion and  $\alpha$ -syn PFF injection on pole climbing motor behavior.** *CAG-Bmal1* KO and Cre- control mice were treated as in Fig. 4 with tamoxifen at 2mo, then with unilateral striatal injection of PBS or  $\alpha$ -syn PFFs at 3 mos. 80 days later, mice were tested in pole climbing, with both turnaround time (left panel) and total climb time (right panel) recorded. 2-way ANOVA showed a significant main effect of genotype, but no effect of  $\alpha$ -syn PFF injection, and no interaction between genotype and  $\alpha$ -syn PFF injection.

For turnaround time, 2-way ANOVA showed a significant main effect of Cre genotype ( $F(1,23)=4.593$ ,  $P=0.0429$ ), but main effect of PFF injection ( $F(1,23)=0.007644$ ,  $P=0.9311$ ) and interaction  $F(1,23)=0.06145$ ,  $P=0.8064$ ) were not significant.

For total time time, 2-way ANOVA showed a significant main effect of Cre genotype ( $F(1,23)=5.745$ ,  $P=0.0$ ), but main effect of PFF injection ( $F(1,23)=0.0001$ ,  $P=0.9968$ ) and interaction  $F(1,23)=0.1787$ ,  $P=0.6764$ ) were not significant.

**FIGURE S6**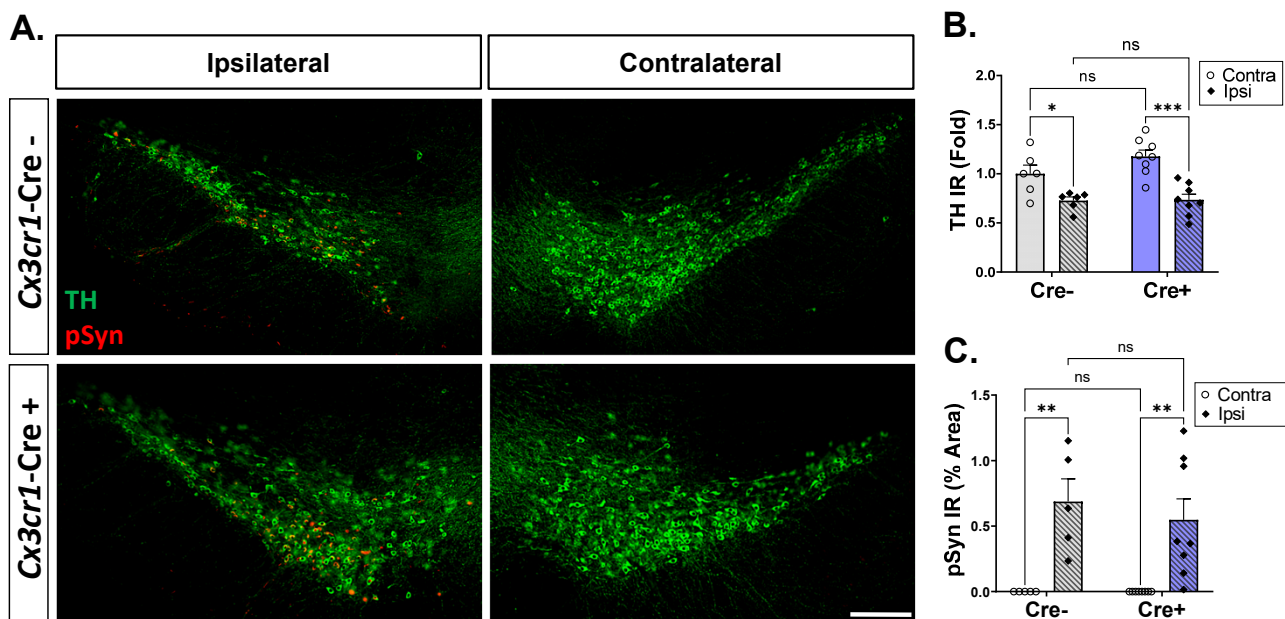

**Supplement Figure 6: Microglial *Bmal1* deletion does not impact spontaneous or  $\alpha$ Syn PFF-induced dopaminergic neurodegeneration.**

A. *Cx3cr1-Cre*<sup>ERT2</sup>;*Bmal1*<sup>ff</sup> mice and Cre- littermate controls were treated with tamoxifen at 2mo, then each received a unilateral intrastriatal injection of  $\alpha$ Syn PFFs. After 3 months, TH+ neurons and pSyn immunoreactivity were quantified in the SNpc bilaterally. Ipsi: Ipsilateral to PFF injection. Contra: Contralateral to PFF injection.

B. PFF injection caused ipsilateral TH+ neuron loss with no effect of Cre genotype. 2-way ANOVA showed a significant main effect of injection side ( $F(1,24)=30.01$ ,  $P<0.0001$ ), but main effect of Cre genotype ( $F(1,24)=2.014$ ,  $P=0.1687$ ), and interaction ( $F(1,24)=1.645$ ,  $P<0.2119$ ), were not significant.

C. PFF injection caused ipsilateral pSyn accumulation with no effect of Cre genotype 2-way ANOVA showed a significant main effect of injection side ( $F(1,22)=25.49$ ,  $P<0.0001$ ), but main effect of Cre genotype or interaction ( $F(1,22)=0.3246$ ,  $P=0.5746$ ) were not significant.

\* $P<0.05$ , \*\* $<0.01$ , \*\*\* $<0.005$  by Tukey's multiple comparisons test. N=5-8 mice/group, mixed sexes.
